# Supplementary material
Source: PubMed Central journal article supplement (PMC3761132)

**A**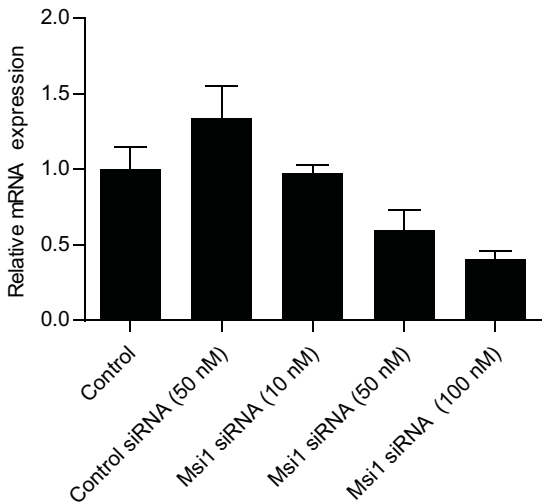**B**

|                    |   |    |     |    |    |     |
|--------------------|---|----|-----|----|----|-----|
| Control siRNA (nM) | 0 | 50 | 100 | 0  | 0  | 0   |
| Msi1 siRNA (nM)    | 0 | 0  | 0   | 10 | 50 | 100 |

Msi1

Actin

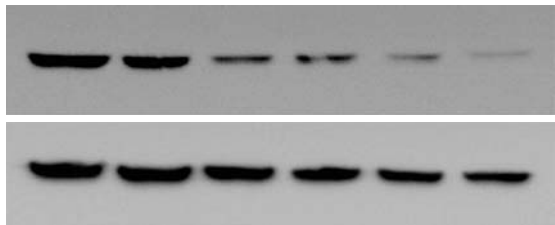

Supplement: mmc1.pdf [file mmc1.pdf]

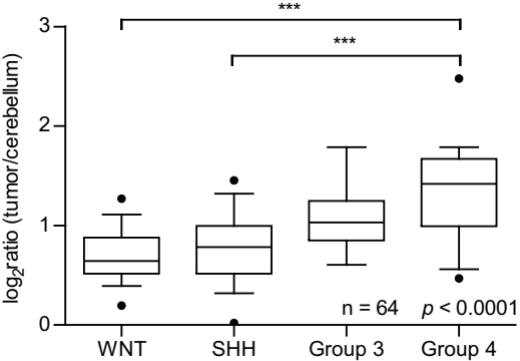

Supplement: mmc2.pdf [file mmc2.pdf]

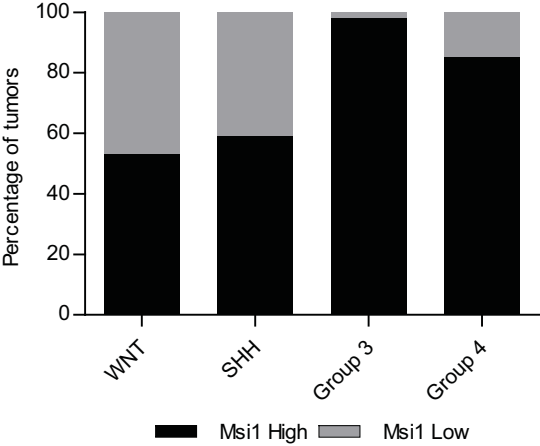

Supplement: mmc3.pdf [file mmc3.pdf]

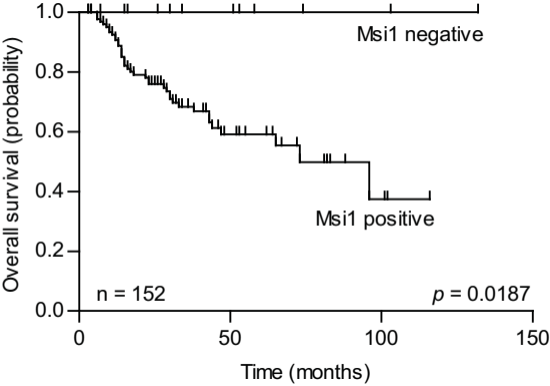

Supplement: mmc4.pdf [file mmc4.pdf]

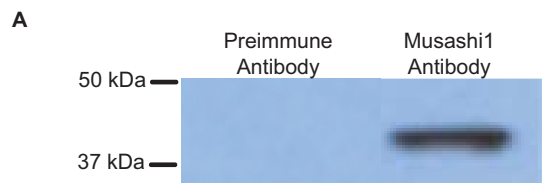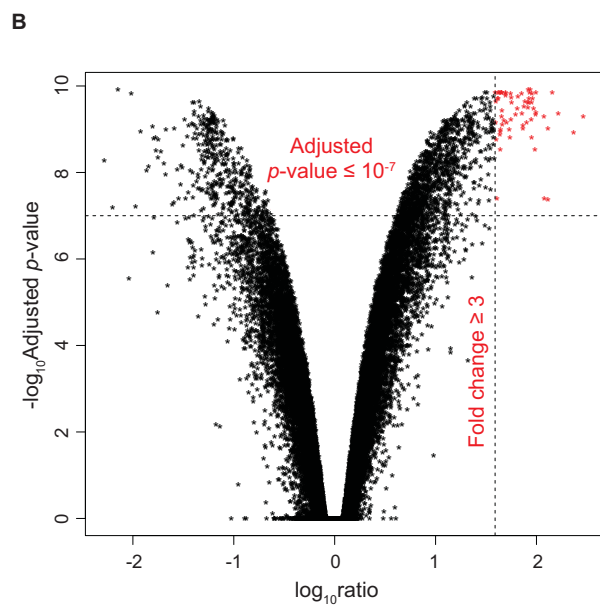

Supplement: mmc5.pdf [file mmc5.pdf]

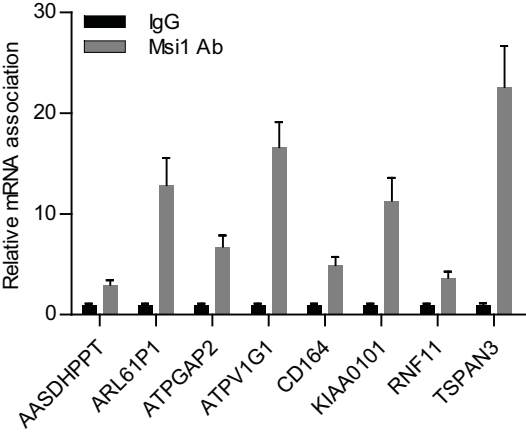

Supplement: mmc6.pdf [file mmc6.pdf]
